# Supplementary material for: Luminescence properties and site occupancy of Ce3+ in Ba2SiO4: a combined experimental and ab initio study
Source: Royal Society of Chemistry journal article supplement (doi:10.1039/c7ra04145d), 2017-01-01
Supplement: c7ra04145d1.pdf [file c7ra04145d1.pdf]

## Electronic Supplementary Information

### Luminescence properties and site occupancy of Ce<sup>3+</sup> in Ba<sub>2</sub>SiO<sub>4</sub>: a combined experimental and ab initio study

Litian Lin,<sup>a</sup> Xiaoxiao Huang,<sup>b</sup> Rui Shi,<sup>a</sup> Weijie Zhou,<sup>a</sup> Yan Huang,<sup>c</sup> Jiuping Zhong,<sup>a</sup>  
Ye Tao,<sup>c</sup> Jun Chen,<sup>d</sup> Lixin Ning<sup>\*,b</sup> and Hongbin Liang<sup>\*,a</sup>

<sup>a</sup> MOE Key Laboratory of Bioinorganic and Synthetic Chemistry, KLGHEI of Environment and Energy Chemistry, School of Chemistry, Sun Yat-sen University, Guangzhou 510275, China

<sup>b</sup> Anhui Province Key Laboratory of Optoelectric Materials Science and Technology, Department of Physics, Anhui Normal University, Wuhu, Anhui 241000, China

<sup>c</sup> Beijing Synchrotron Radiation Facility, Institute of High Energy Physics, Chinese Academy of Sciences, Beijing 100039, China

<sup>d</sup> School of Electronics and Information Technology, Sun Yat-sen University, Guangzhou 510275, China

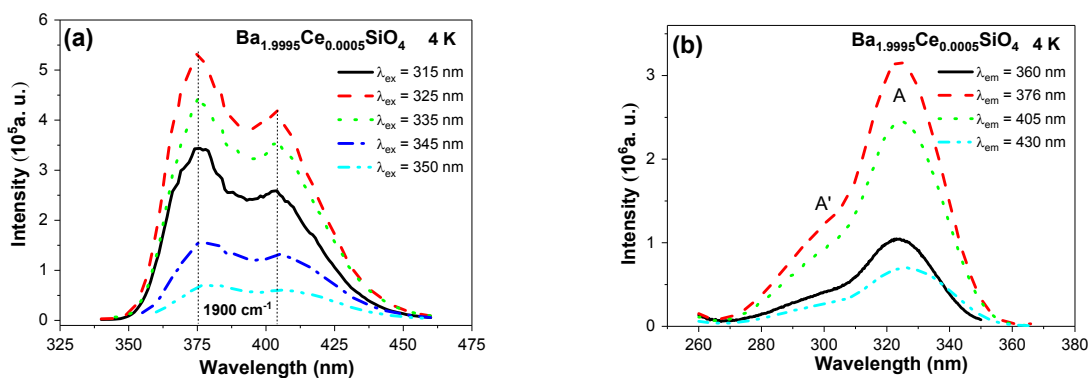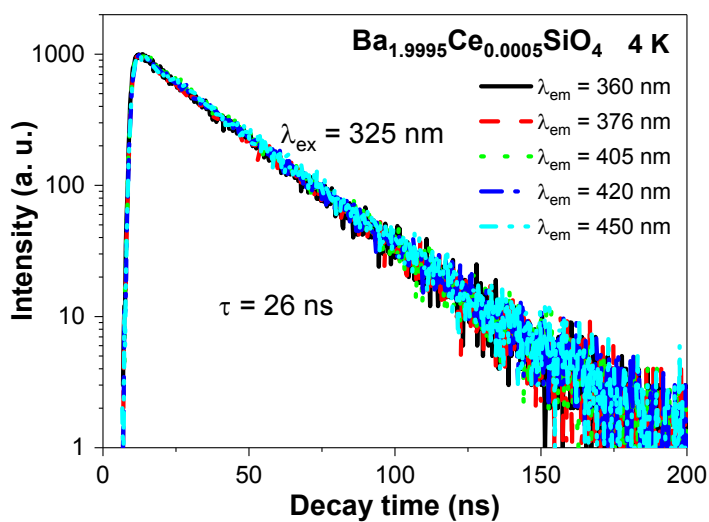

**Fig. S2** Luminescence decay curves ( $\lambda_{\text{ex}} = 325$  nm;  $\lambda_{\text{em}} = 360, 376, 405, 420,$  and  $450$  nm) of  $\text{Ba}_{1.9995}\text{Ce}_{0.0005}\text{SiO}_4$  at 4 K.
